# Supplementary material for: Relative Codon Adaptation: A Generic Codon Bias Index for Prediction of Gene Expression
Source: PubMed Central journal article supplement — DNA Res. 2010 May 7;17(3):185–96. doi: 10.1093/dnares/dsq012 (PMC2885275; doi:10.1093/dnares/dsq012), 2010-05-07
Supplement: dsq012_1.pdf [file dsq012_1.pdf]

**Mean RCBS vs. length** (A)

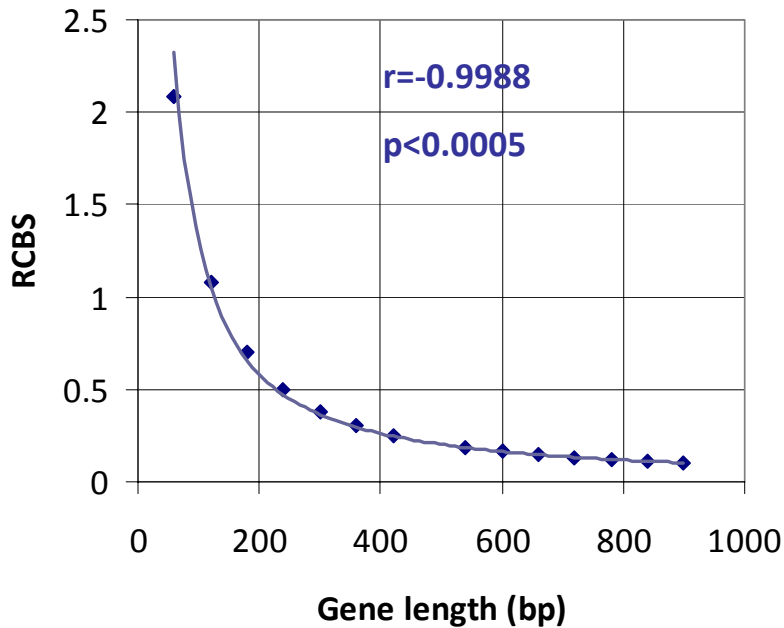

**Mean RCBS vs. length** (B)

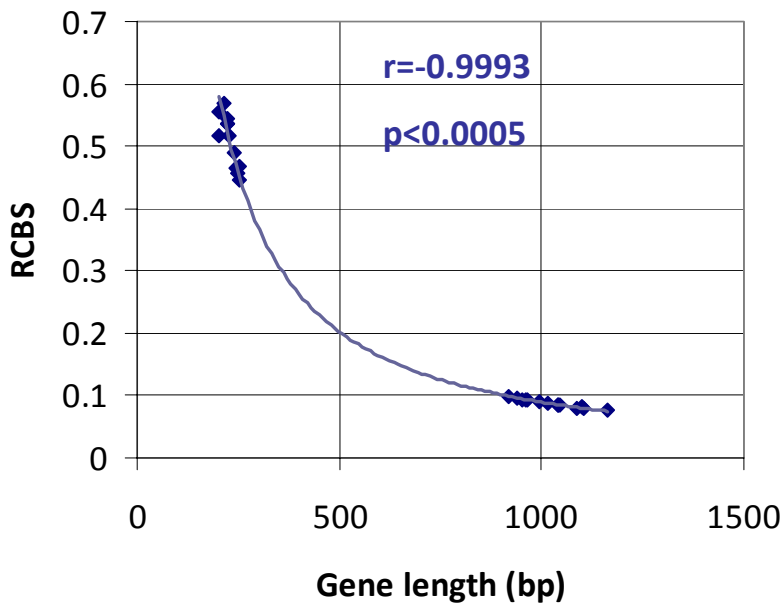

**Figure S1** – Distribution of average RCBS values vs. length for 14 group lengths of arbitrary nucleotide sequences randomized 500 times (A) and 26 *E. coli* gene sequences, each randomized 500 times. Data from Roymondal *et al.* Tables SIIA and SIIB .

## CAI vs. Gene length (4,029 *E. coli* genes)

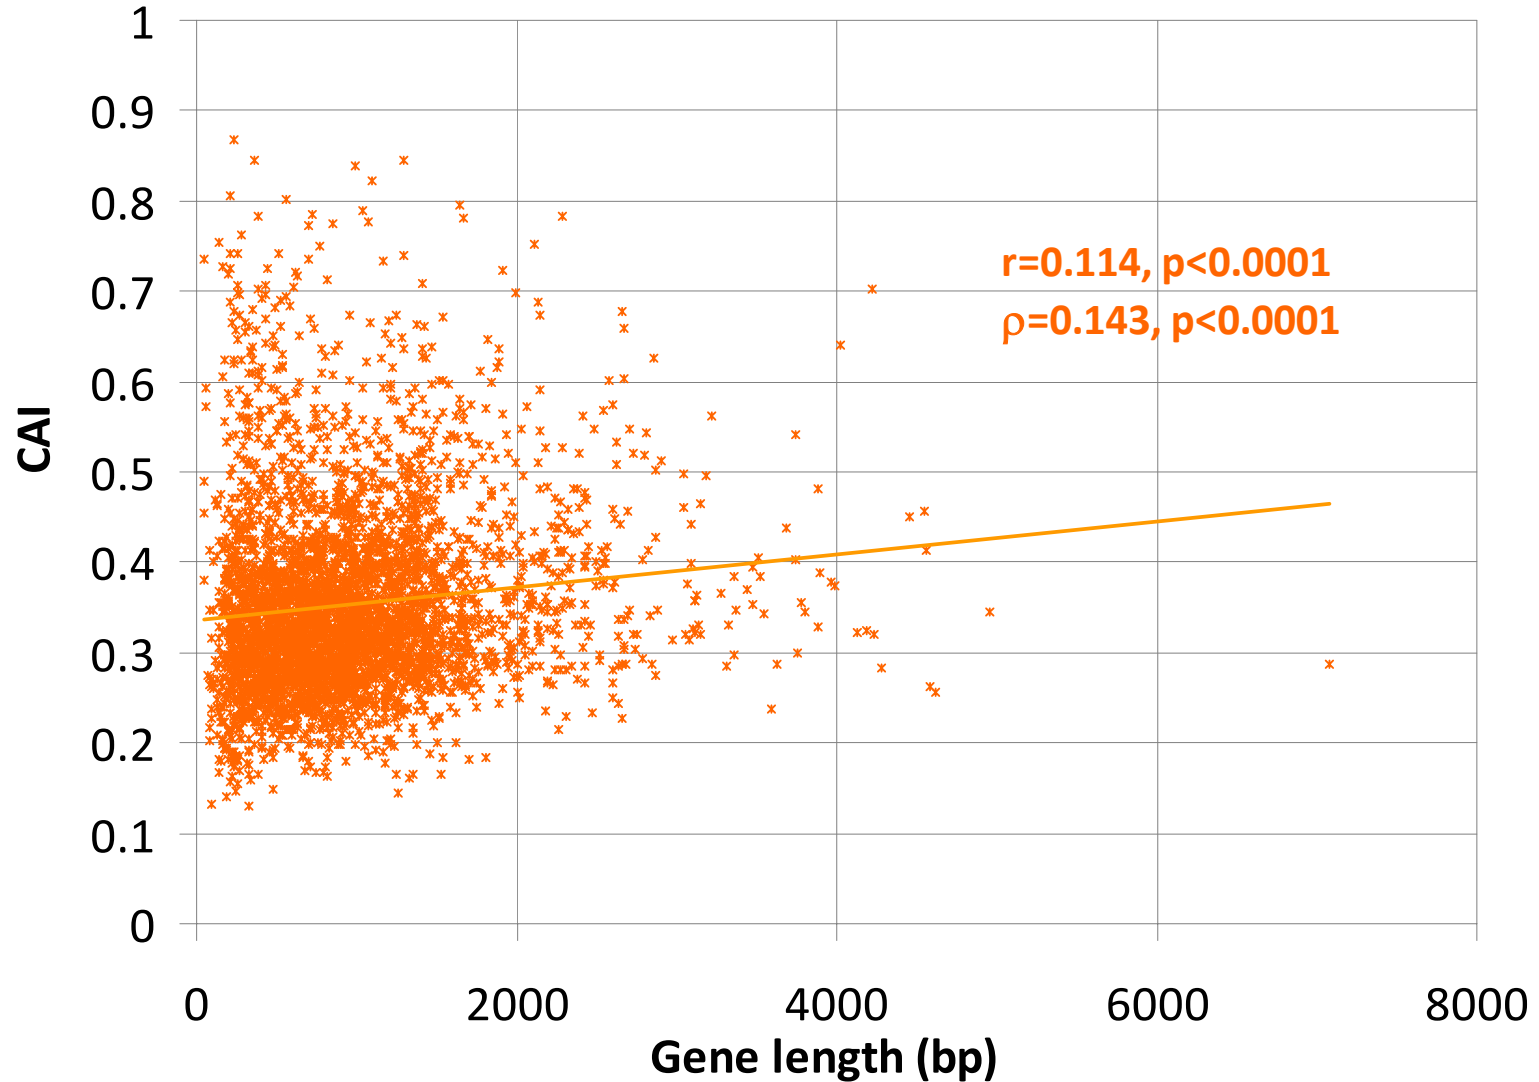

**Figure S2** – Distribution of CAI values vs. length for the 4,029 *E. coli* genes in the M<sup>3D</sup>-derived expression dataset.

## RCBS vs. gene length

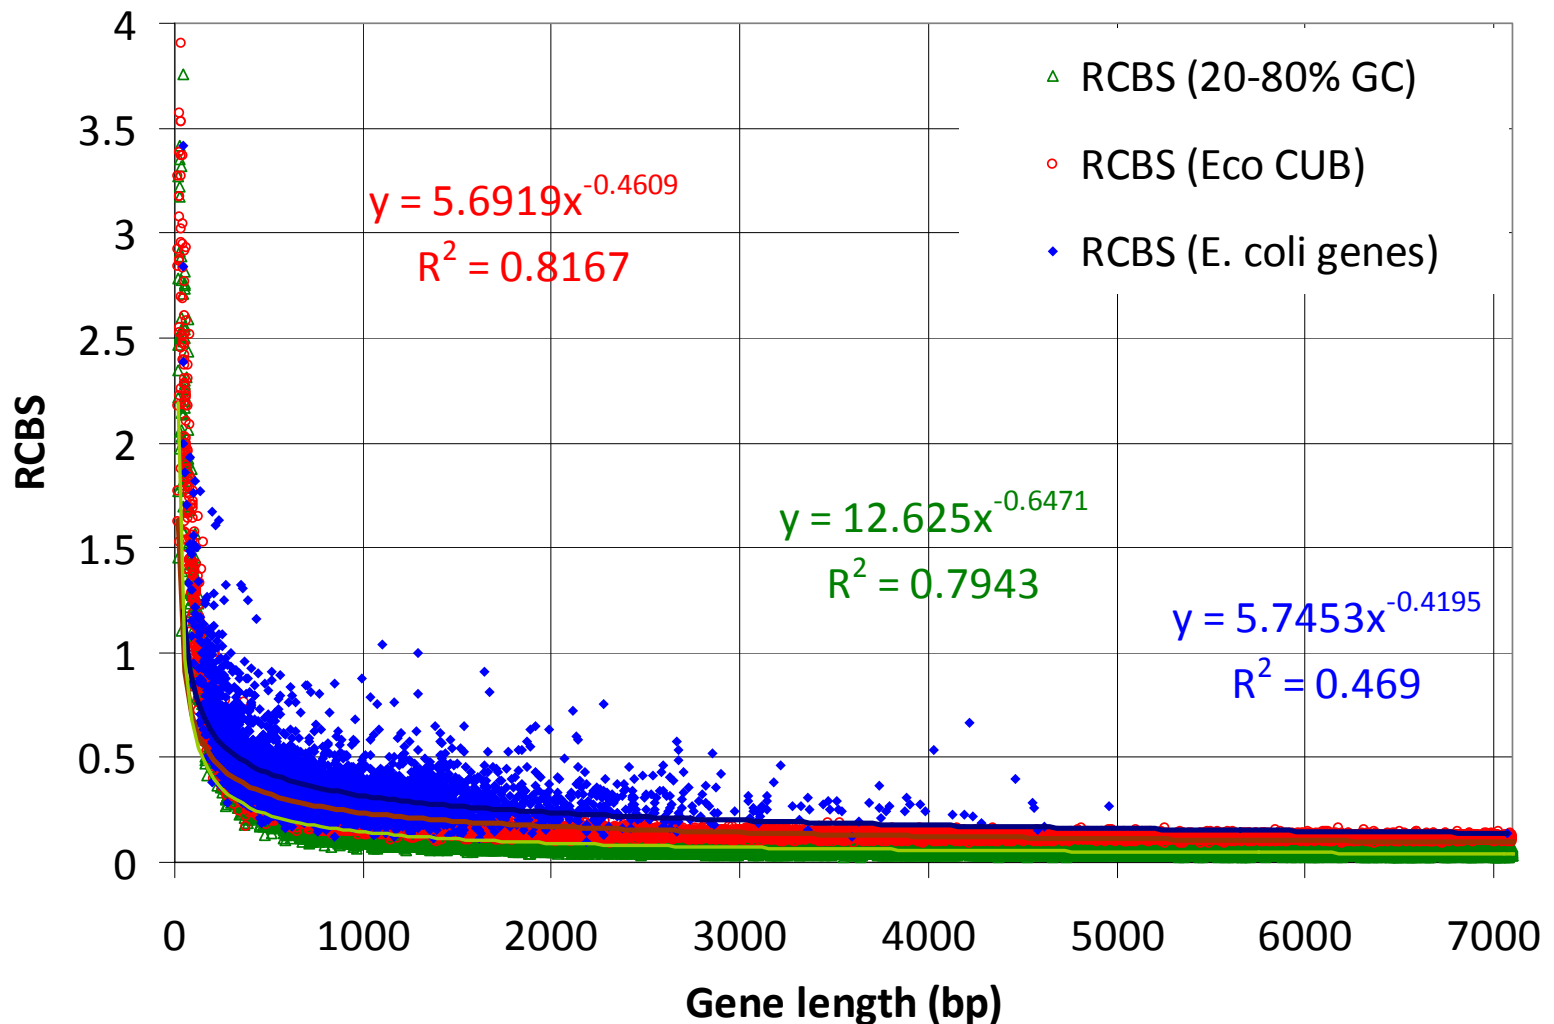

**Figure S3** – Distribution of RCBS values vs. length for the 4,029 *E. coli* genes in the M<sup>3D</sup>-derived expression dataset, 30,000 randomly generated sequences of random length with random %GC content in the 20%-80% range and 30,000 randomly generated sequences of random length following the *E. coli* codon usage bias (CUB). The power law fit equations are shown, together with their coefficients of determination ( $r^2$ ). All correlation coefficients have  $p < 0.000001$ .

(A)

**RCBS / RCBS<sup>PC</sup> vs. CAI**4,029 *E. coli* genes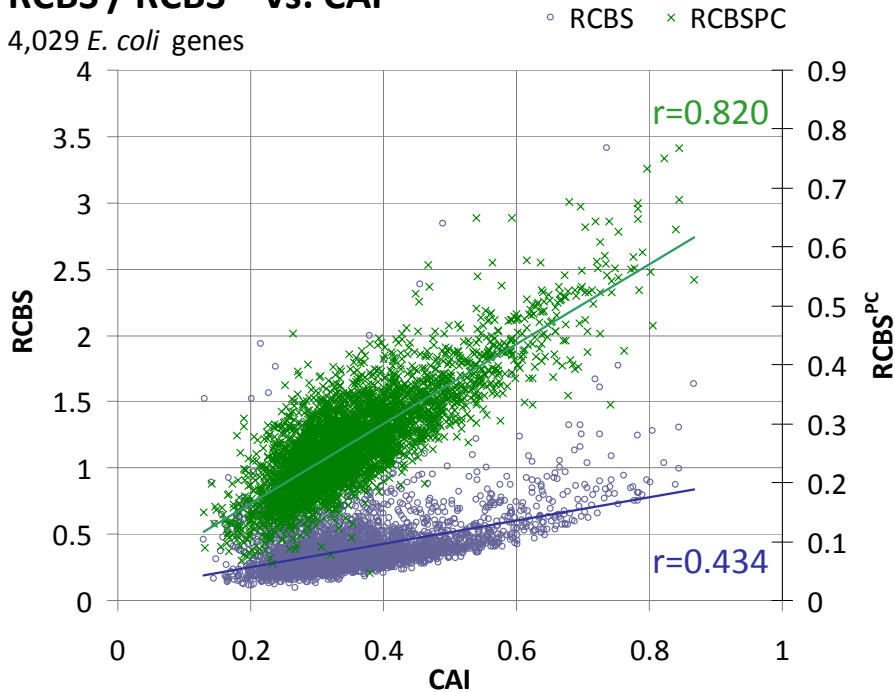

(B)

**RCBS & RCBS<sup>PC</sup> vs. E(g)**96 *E. coli* genes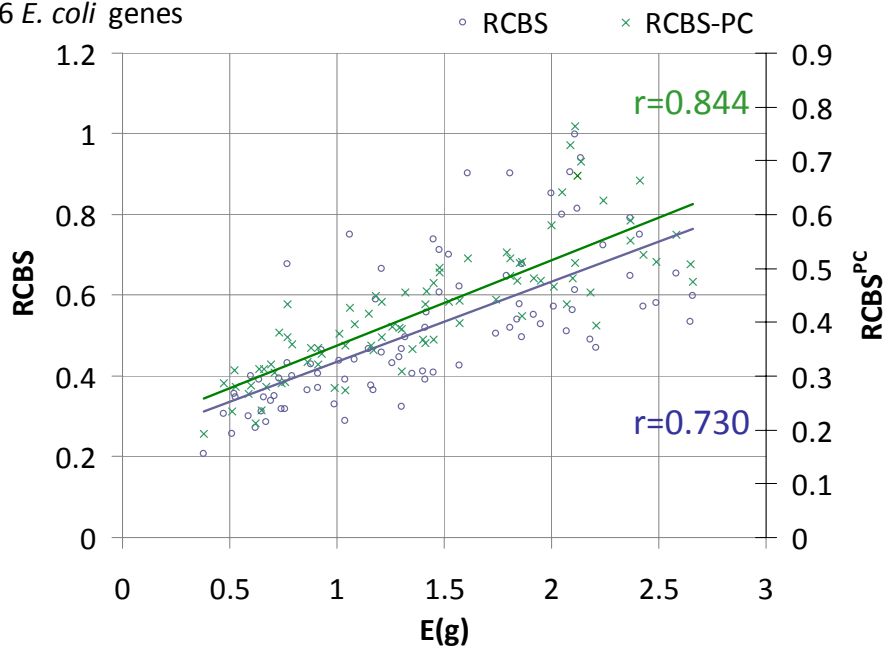

**Figure S4 – (A)** Distribution of RCBS and RCBS<sup>PC</sup> values vs. CAI for the 4,029 *E. coli* genes in the M<sup>3D</sup>-derived expression dataset. Correlation coefficients:  $r=0.433^{***}$ ,  $\rho=0.448^{***}$  for RCBS;  $r=0.820^{***}$ ,  $\rho=0.753^{***}$  for RCBS<sup>PC</sup>. **(B)** Distribution of RCBS and RCBS<sup>PC</sup> values vs. E(g) for the 96 genes in the Karlin *et al.* dataset. Correlation coefficients:  $r=0.730^{***}$ ,  $\rho=0.820^{***}$  for RCBS;  $r=0.844^{***}$ ,  $\rho=0.894^{***}$  for RCBS<sup>PC</sup>.

# Average expression vs. Length

31 experiments / 4,031 genes

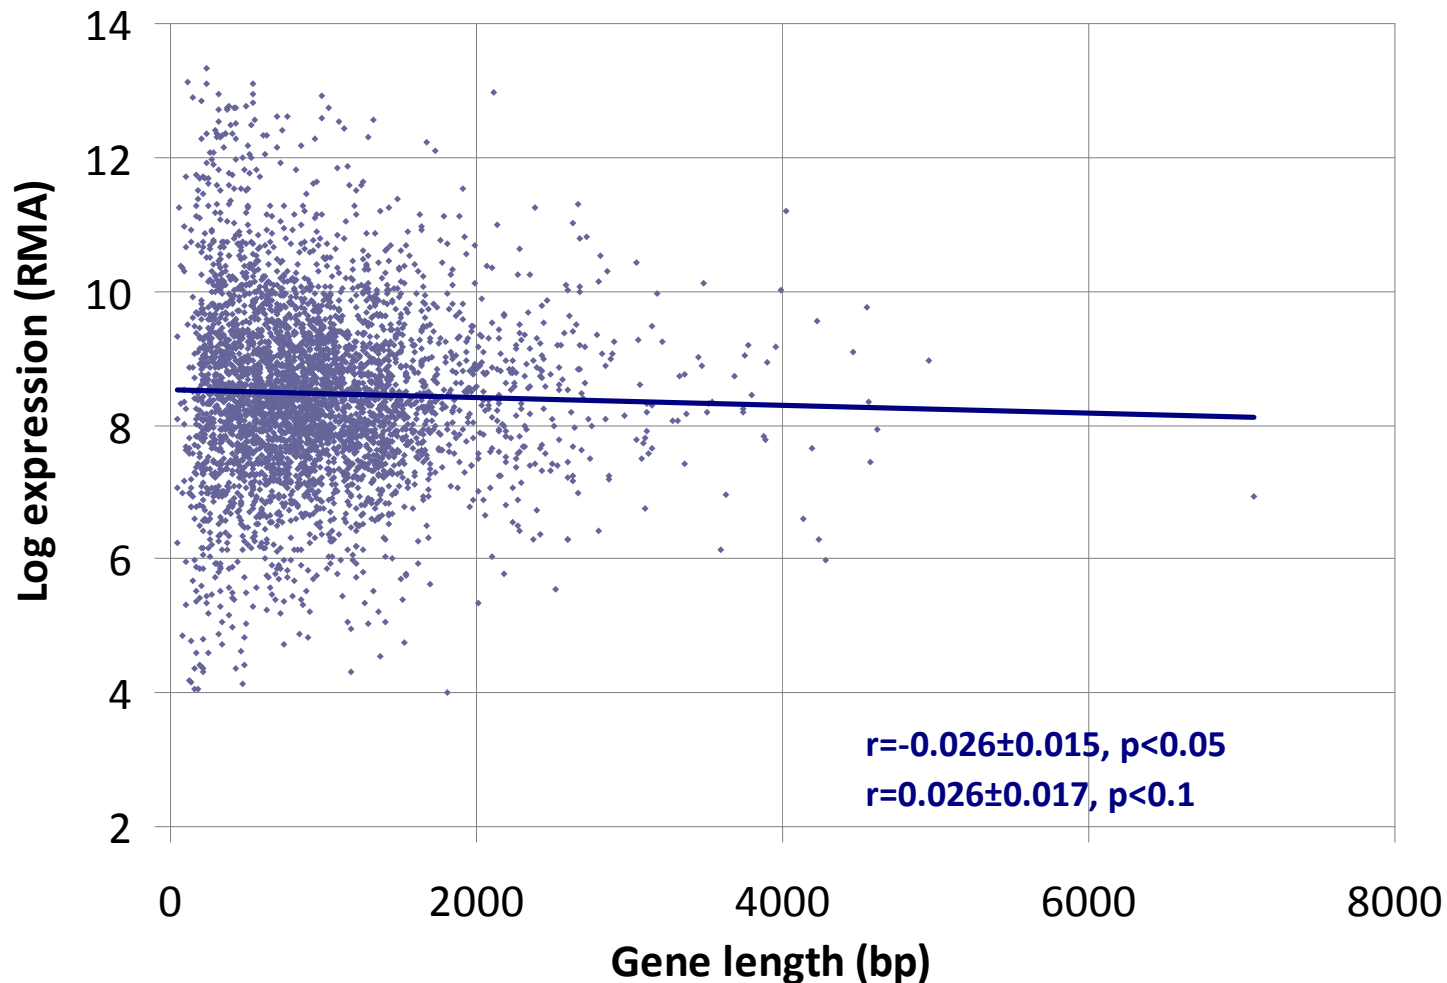

**Figure S5** – Plot of log expression, normalized RMA values vs. gene length for 4,031 *E. coli* genes. The plot corresponds to the average log expression value for 31 experiments. Correlation coefficients were computed independently for each experiment and their mean and standard deviation are reported.

# Gene length histogram

*E. coli* (4,031 genes)

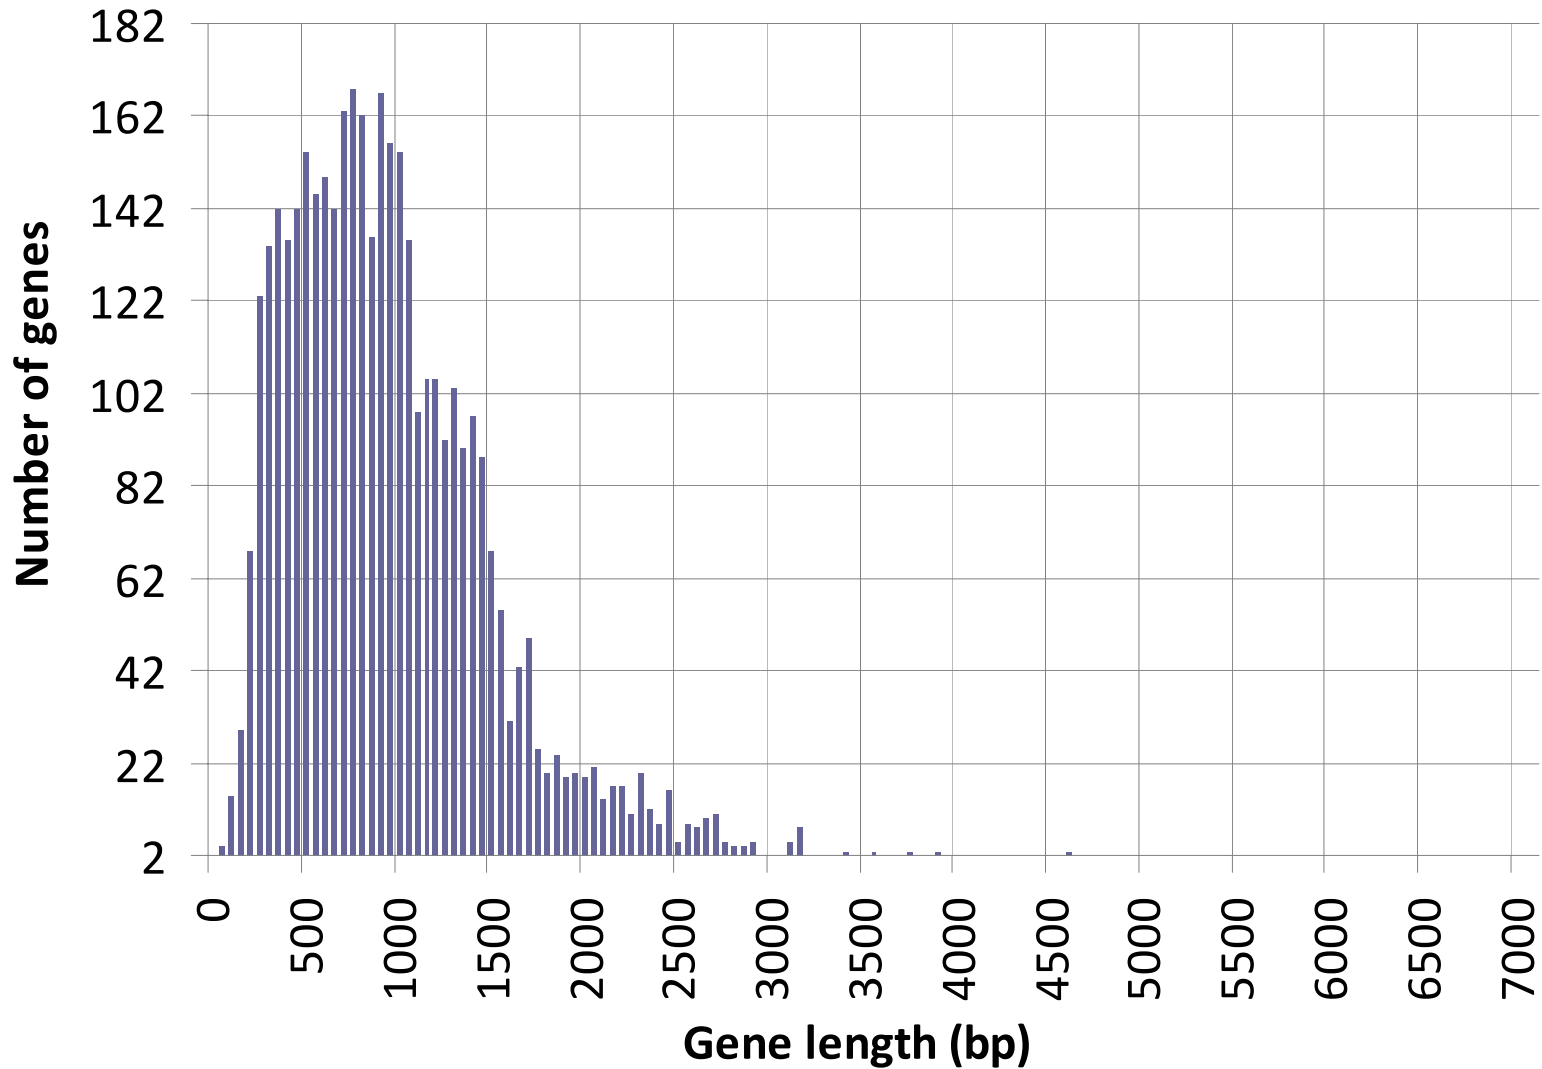

**Figure S6** – Gene length histogram for 4,031 *E. coli* genes. Genes shorter than 1,000 bp account for more than a half (2,334 genes) of this dataset.
